# Supplementary material for: Comparative Genomics of the Rhodococcus Genus Shows Wide Distribution of Biodegradation Traits
Source: MDPI journal article supplement (doi:10.3390/microorganisms8050774), 2020-05-21
Supplement: s1 [file s1]

**Supplementary Table S1.** List of *Rhodococcus* genomes used in this study.

| Name                                    | Type strain? | Assembly        | Size (Mb) | GC%  | Scaffolds | Genes | CDSs  |
|-----------------------------------------|--------------|-----------------|-----------|------|-----------|-------|-------|
| <i>R. aetherivorans</i> BCP1            | no           | GCA_000470885.1 | 6.23      | 70.3 | 3         | 5,713 | 5,495 |
| <i>R. aetherivorans</i> IcdP1           | no           | GCA_000982715.1 | 5.92      | 70.6 | 1         | 5,388 | 5,020 |
| <i>R. agglutinans</i> CCTCC AB2014297   | YES          | GCA_004011865.1 | 5.43      | 69.2 | 22        | 4,988 | 4,835 |
| <i>R. baikonurensis</i> JCM 18801       | no           | GCA_001311605.1 | 6.82      | 62.4 | 633       | -     | -     |
| <i>R. biphenylivorans</i> TG9           | YES          | GCA_003288095.1 | 5.03      | 68   | 1         | 4,700 | 4,373 |
| <i>R. coprophilus</i> NCTC 10994        | YES          | GCA_900478115.1 | 4.58      | 66.8 | 1         | 4,222 | 4,081 |
| <i>R. corynebacterioides</i> NBRC 14404 | YES          | GCA_001894765.1 | 3.98      | 70.3 | 14        | 3655  | 3564  |
| <i>R. defluvii</i> Ca11 T               | YES          | GCA_000738775.1 | 5.13      | 68.7 | 267       | 4,693 | 4,535 |
| <i>R. enclensis</i> 23b-28              | no           | GCA_002744595.1 | 7.21      | 62.3 | 117       | 6828  | 6532  |
| <i>R. erythropolis</i> 1159             | no           | GCA_002091935.1 | 7.09      | 62.3 | 112       | 6629  | 6359  |
| <i>R. erythropolis</i> ACN1             | no           | GCA_002303875.1 | 7.24      | 62.3 | 92        | 6711  | 6479  |
| <i>R. erythropolis</i> ATCC 15903       | no           | GCA_003388635.1 | 7.24      | 62.4 | 86        | 6870  | 6512  |
| <i>R. erythropolis</i> AV96             | no           | GCA_002233715.1 | 6.44      | 62.4 | 45        | 6047  | 4918  |
| <i>R. erythropolis</i> B7g              | no           | GCA_003444715.1 | 7.14      | 62.4 | 93        | 6696  | 6475  |
| <i>R. erythropolis</i> BG43             | no           | GCA_000975175.1 | 6.87      | 62.3 | 4         | 6396  | 6233  |
| <i>R. erythropolis</i> CAS922i          | no           | GCA_001020225.1 | 7.20      | 62.3 | 108       | 6727  | 6496  |
| <i>R. erythropolis</i> CCM2595          | no           | GCA_000454045.1 | 6.37      | 62.5 | 2         | 5895  | 5776  |
| <i>R. erythropolis</i> DN1              | no           | GCA_000454425.1 | 6.55      | 62.4 | 78        | 6152  | 5629  |
| <i>R. erythropolis</i> IEGM 267         | no           | GCA_001900745.1 | 7.18      | 62.3 | 231       | 6745  | 6481  |
| <i>R. erythropolis</i> JCM 3201         | YES          | GCA_003990875.1 | 6.65      | 62.4 | 3         | 6150  | 5976  |
| <i>R. erythropolis</i> JCM 6824         | no           | GCA_000747745.1 | 7.02      | 62.3 | 198       | 6608  | 6372  |
| <i>R. erythropolis</i> JCM 9803         | no           | GCA_001312725.1 | 6.87      | 62.3 | 212       | -     | -     |
| <i>R. erythropolis</i> JCM 9804         | no           | GCA_001313245.1 | 6.55      | 62.4 | 260       | 6309  | 3200  |
| <i>R. erythropolis</i> JCM 9805         | no           | GCA_001312745.1 | 6.96      | 62.4 | 235       | 6669  | 4261  |
| <i>R. erythropolis</i> MI2              | no           | GCA_001766885.1 | 7.18      | 62.3 | 123       | 6765  | 6533  |
| <i>R. erythropolis</i> NCTC8036         | no           | GCA_900455855.1 | 6.55      | 62.4 | 3         | 6044  | 5886  |
| <i>R. erythropolis</i> NRRL B-16532     | no           | GCA_000719985.1 | 6.94      | 62.4 | 160       | 5522  | 6300  |
| <i>R. erythropolis</i> NSX2             | no           | GCA_001715845.1 | 6.28      | 62.4 | 37        | 5820  | 5692  |
| <i>R. erythropolis</i> PR4              | no           | GCA_000010105.1 | 6.90      | 62.3 | 4         | 6491  | 6321  |
| <i>R. erythropolis</i> R138             | no           | GCA_000696675.2 | 6.81      | 62.3 | 3         | 6301  | 6130  |
| <i>R. erythropolis</i> S-43             | no           | GCA_000830355.1 | 6.81      | 62.2 | 533       | 6678  | 3687  |
| <i>R. erythropolis</i> SK121            | no           | GCA_000174835.1 | 6.79      | 62.5 | 124       | 6369  | 6158  |
| <i>R. erythropolis</i> VSD3             | no           | GCA_001831305.1 | 6.55      | 62.4 | 38        | 6064  | 5659  |
| <i>R. erythropolis</i> XP               | no           | GCA_000225665.2 | 7.23      | 62.3 | 9         | 6826  | 6569  |
| <i>R. fascians</i> 02-815               | no           | GCA_000760835.1 | 6.24      | 64.4 | 30        | 5817  | 5674  |
| <i>R. fascians</i> 02-816c              | no           | GCA_000760855.1 | 6.08      | 64.6 | 45        | 5830  | 5674  |
| <i>R. fascians</i> 04-516               | no           | GCA_000760685.1 | 5.82      | 64.3 | 23        | 5472  | 5315  |
| <i>R. fascians</i> 05-339-1             | no           | GCA_000760895.1 | 5.73      | 64.7 | 21        | 5454  | 5307  |
| <i>R. fascians</i> 05-561-1             | no           | GCA_000760875.1 | 5.61      | 64.5 | 30        | 5311  | 5187  |
| <i>R. fascians</i> 14-2632c-1           | no           | GCA_002259325.1 | 5.95      | 64.4 | 41        | 5639  | 5477  |
| <i>R. fascians</i> 14-2632-D2           | no           | GCA_002259295.1 | 5.93      | 64.4 | 44        | 5621  | 5459  |
| <i>R. fascians</i> 15-508-1b            | no           | GCA_002258705.1 | 5.95      | 64.4 | 41        | 5637  | 5478  |
| <i>R. fascians</i> A2                   | no           | GCA_002259505.1 | 5.97      | 64.4 | 44        | 5662  | 5500  |
| <i>R. fascians</i> A21d2                | no           | GCA_000760905.1 | 5.98      | 64.1 | 30        | 5624  | 5470  |
| <i>R. fascians</i> A22b                 | no           | GCA_000759005.1 | 5.91      | 64.3 | 67        | 5574  | 5354  |
| <i>R. fascians</i> A25f                 | no           | GCA_000760935.1 | 5.87      | 64.2 | 17        | 5551  | 5404  |
| <i>R. fascians</i> A3b                  | no           | GCA_000760675.1 | 6.03      | 64.3 | 34        | 5758  | 5579  |
| <i>R. fascians</i> A44A                 | no           | GCA_000760735.1 | 5.95      | 64.6 | 9         | 5564  | 5416  |
| <i>R. fascians</i> A73a                 | no           | GCA_000760755.1 | 5.93      | 64.4 | 23        | 5489  | 5333  |
| <i>R. fascians</i> A76                  | no           | GCA_000760955.1 | 6.03      | 64.6 | 29        | 5709  | 5566  |
| <i>R. fascians</i> A78                  | no           | GCA_000760775.1 | 6.00      | 64.4 | 41        | 5659  | 5503  |
| <i>R. fascians</i> B3                   | no           | GCA_002259465.1 | 5.93      | 64.4 | 46        | 5621  | 5461  |
| <i>R. fascians</i> D188                 | no           | GCA_001620305.1 | 5.50      | 64.6 | 3         | 5149  | 5015  |
| <i>R. fascians</i> F7                   | no           | GCA_001037935.1 | 5.25      | 64.7 | 21        | 4929  | 4819  |
| <i>R. fascians</i> GIC26                | no           | GCA_000760795.1 | 5.33      | 64.5 | 49        | 4991  | 4831  |
| <i>R. fascians</i> GIC36                | no           | GCA_000760815.1 | 5.56      | 64.5 | 46        | 5232  | 5060  |
| <i>R. fascians</i> LMG 3602             | no           | GCA_000760995.1 | 5.36      | 64.6 | 25        | 5113  | 4961  |
| <i>R. fascians</i> LMG 3605             | no           | GCA_000761015.1 | 5.44      | 64.6 | 28        | 5123  | 4976  |
| <i>R. fascians</i> LMG 3616             | no           | GCA_000761035.1 | 5.76      | 64.4 | 42        | 5455  | 5283  |
| <i>R. fascians</i> LMG 3623             | YES          | GCA_000761055.1 | 5.77      | 64.4 | 30        | 5427  | 5271  |
| <i>R. fascians</i> LMG 3625             | no           | GCA_000761075.1 | 5.94      | 64.2 | 17        | 5719  | 5576  |
| <i>R. globerulus</i> NBRC 14531         | YES          | GCA_001894805.1 | 6.74      | 61.7 | 30        | 6231  | 6054  |
| <i>R. globerulus</i> WS3306             | no           | GCA_003097035.1 | 6.77      | 61.7 | 2         | 6220  | 5996  |
| <i>R. gordoniae</i> NCTC13296           | YES          | GCA_900455725.1 | 4.87      | 67.9 | 3         | 4,458 | 4,287 |
| <i>R. hoagii</i> 103S                   | no           | GCA_000196695.1 | 5.04      | 68.8 | 1         | 4,649 | 4,540 |
| <i>R. hoagii</i> ATCC 33707             | no           | GCA_000164155.2 | 5.26      | 68.7 | 1         | 4,899 | 4,775 |
| <i>R. hoagii</i> DSM 20295              | YES          | GCA_001646645.1 | 4.97      | 68.8 | 279       | 4,757 | 4,427 |

|                                    |     |                 |       |      |     |       |       |
|------------------------------------|-----|-----------------|-------|------|-----|-------|-------|
| <i>R. hoagii</i> DSM 20307         | no  | GCA_002094305.1 | 5.20  | 68.8 | 37  | 4,850 | 4,735 |
| <i>R. hoagii</i> DSSKP-R-001       | no  | GCA_003013675.1 | 5.44  | 68.7 | 3   | 5,118 | 4,987 |
| <i>R. hoagii</i> N1288             | no  | GCA_001646885.1 | 5.17  | 68.8 | 47  | 4,845 | 4,685 |
| <i>R. hoagii</i> N1295             | no  | GCA_001646905.1 | 5.31  | 68.7 | 156 | 5,034 | 4,769 |
| <i>R. hoagii</i> N1301             | no  | GCA_001646925.1 | 5.65  | 68.5 | 61  | 5,297 | 5,099 |
| <i>R. hoagii</i> NBRC 101255 - C 7 | no  | GCA_001552575.1 | 5.20  | 68.8 | 48  | 4,879 | 4,725 |
| <i>R. hoagii</i> NCTC1621          | no  | GCA_900455845.1 | 5.24  | 68.8 | 3   | 4,885 | 4,760 |
| <i>R. hoagii</i> NCTC5650          | no  | GCA_900455885.1 | 5.31  | 68.7 | 7   | 4,962 | 4,785 |
| <i>R. hoagii</i> PAM1204           | no  | GCA_002078545.1 | 5.23  | 68.8 | 42  | 4,829 | 4,713 |
| <i>R. hoagii</i> PAM1216           | no  | GCA_002095175.1 | 5.20  | 68.8 | 41  | 4,838 | 4,719 |
| <i>R. hoagii</i> PAM1271           | no  | GCA_002095045.1 | 5.20  | 68.8 | 41  | 4,849 | 4,732 |
| <i>R. hoagii</i> PAM1340           | no  | GCA_002095085.1 | 5.06  | 68.8 | 25  | 4,710 | 4,599 |
| <i>R. hoagii</i> PAM1354           | no  | GCA_002095035.1 | 5.37  | 68.7 | 37  | 4,983 | 4,862 |
| <i>R. hoagii</i> PAM1357           | no  | GCA_002095125.1 | 5.01  | 68.8 | 24  | 4,658 | 4,547 |
| <i>R. hoagii</i> PAM1413           | no  | GCA_002095115.1 | 5.04  | 68.8 | 39  | 4,693 | 4,558 |
| <i>R. hoagii</i> PAM1422           | no  | GCA_002095195.1 | 5.20  | 68.8 | 41  | 4,842 | 4,729 |
| <i>R. hoagii</i> PAM1475           | no  | GCA_002095185.1 | 5.21  | 68.8 | 60  | 4,823 | 4,703 |
| <i>R. hoagii</i> PAM1496           | no  | GCA_002095155.1 | 5.09  | 68.8 | 41  | 4,726 | 4,603 |
| <i>R. hoagii</i> PAM1533           | no  | GCA_002095235.1 | 5.13  | 68.8 | 82  | 4,814 | 4,657 |
| <i>R. hoagii</i> PAM1557           | no  | GCA_002095255.1 | 5.35  | 68.7 | 34  | 4,976 | 4,851 |
| <i>R. hoagii</i> PAM1571           | no  | GCA_002094265.1 | 5.42  | 68.6 | 61  | 5,027 | 4,886 |
| <i>R. hoagii</i> PAM1572           | no  | GCA_002078535.1 | 5.12  | 68.8 | 29  | 4,735 | 4,631 |
| <i>R. hoagii</i> PAM1593           | no  | GCA_002078625.1 | 5.24  | 68.7 | 49  | 4,865 | 4,739 |
| <i>R. hoagii</i> PAM1600           | no  | GCA_002078515.1 | 5.14  | 68.8 | 41  | 4,757 | 4,661 |
| <i>R. hoagii</i> PAM1637           | no  | GCA_002095295.1 | 5.08  | 68.9 | 45  | 4,686 | 4,588 |
| <i>R. hoagii</i> PAM1643           | no  | GCA_002094235.1 | 5.09  | 68.8 | 31  | 4,765 | 4,650 |
| <i>R. hoagii</i> PAM2012           | no  | GCA_002094445.1 | 5.33  | 68.7 | 31  | 4,932 | 4,815 |
| <i>R. hoagii</i> PAM2274           | no  | GCA_002094225.1 | 5.22  | 68.7 | 44  | 4,869 | 4,745 |
| <i>R. hoagii</i> PAM2276           | no  | GCA_002094315.1 | 5.61  | 68.6 | 840 | 5,192 | 4,879 |
| <i>R. hoagii</i> PAM2279           | no  | GCA_002094375.1 | 5.03  | 68.8 | 32  | 4,693 | 4,578 |
| <i>R. hoagii</i> PAM2282           | no  | GCA_002094295.1 | 5.27  | 68.7 | 41  | 4,887 | 4,791 |
| <i>R. hoagii</i> PAM2285           | no  | GCA_002094395.1 | 5.19  | 68.8 | 40  | 4,814 | 4,708 |
| <i>R. hoagii</i> PAM2287           | no  | GCA_002094405.1 | 5.14  | 68.9 | 40  | 4,744 | 4,643 |
| <i>R. hoagii</i> PAM2288           | no  | GCA_002094325.1 | 5.48  | 68.7 | 182 | 5,127 | 4,967 |
| <i>R. imtechensis</i> RKJ300       | YES | GCA_000260815.1 | 8.23  | 67.2 | 178 | 7,962 | 7,245 |
| <i>R. jostii</i> DSM 44719         | no  | GCA_900105375.1 | 9.91  | 66.9 | 6   | 9,052 | 8,473 |
| <i>R. jostii</i> NBRC 16295        | YES | GCA_001894825.1 | 9.73  | 66.9 | 286 | 8,983 | 8,358 |
| <i>R. jostii</i> RHA1              | no  | GCA_000014565.1 | 9.70  | 67   | 4   | 9,256 | 8,690 |
| <i>R. koreensis</i> DSM 44498      | YES | GCA_900105905.1 | 10.31 | 67.4 | 9   | 9,491 | 8,902 |
| <i>R. kroppenstedtii</i> DSM 44908 | YES | GCA_900111805.1 | 4.08  | 70.1 | 30  | 3,789 | 3,652 |
| <i>R. kunmingensis</i> DSM 45001   | YES | GCA_001646865.1 | 5.62  | 66.2 | 330 | 5,268 | 4,885 |
| <i>R. kyotonensis</i> JCM 23211    | YES | GCA_900188125.1 | 6.31  | 64.2 | 50  | 5,860 | 5,698 |
| <i>R. kyotonensis</i> KB10         | no  | GCA_001645385.1 | 5.47  | 65.2 | 41  | 5,056 | 4,893 |
| <i>R. maanshanensis</i> DSM 44675  | YES | GCA_900109405.1 | 5.67  | 69.2 | 61  | 5,143 | 4,972 |
| <i>R. marinonascens</i> NBRC 14363 | YES | GCA_001894885.1 | 4.92  | 64.4 | 156 | 4,619 | 4,269 |
| <i>R. opacus</i> 04-OD7            | no  | GCA_002968035.1 | 9.32  | 66.9 | 220 | 8,884 | 8,099 |
| <i>R. opacus</i> 1CP               | no  | GCA_001685605.1 | 8.64  | 67   | 3   | 7,973 | 7,380 |
| <i>R. opacus</i> 8                 | no  | GCA_001292845.1 | 8.51  | 67.2 | 507 | 8,310 | 7,401 |
| <i>R. opacus</i> ATCC 51882        | YES | GCA_004365075.1 | 9.87  | 66.8 | 3   | 9,215 | 8,486 |
| <i>R. opacus</i> B4                | no  | GCA_000010805.1 | 8.83  | 67.6 | 6   | 8,227 | 7,837 |
| <i>R. opacus</i> DSM 44186         | no  | GCA_003626495.1 | 8.81  | 67.1 | 2   | 8,261 | 7,611 |
| <i>R. opacus</i> M213              | no  | GCA_000264745.2 | 9.19  | 67   | 483 | 8,743 | 7,979 |
| <i>R. opacus</i> NRRL B-24011      | no  | GCA_000719995.1 | 6.38  | 62.4 | 334 | 5,835 | 5,672 |
| <i>R. opacus</i> PD630             | no  | GCA_000599545.1 | 9.17  | 67.2 | 10  | 8,402 | 7,903 |
| <i>R. opacus</i> R7                | no  | GCA_000736435.1 | 10.12 | 66.9 | 6   | 9,273 | 8,731 |
| <i>R. phenolicus</i> DSM 44812     | YES | GCA_001646785.1 | 6.28  | 68.4 | 232 | 5,916 | 5,600 |
| <i>R. pyridinivorans</i> AK37      | no  | GCA_000236965.2 | 5.24  | 67.9 | 98  | 4,938 | 4,482 |
| <i>R. pyridinivorans</i> DSM 44555 | YES | GCA_900105195.1 | 5.26  | 67.8 | 3   | 4,864 | 4,604 |
| <i>R. pyridinivorans</i> GF3       | no  | GCA_002269365.1 | 5.30  | 67.9 | 1   | 4,966 | 4,644 |
| <i>R. pyridinivorans</i> KG-16     | no  | GCA_001465325.1 | 5.83  | 67.7 | 87  | 5,286 | 5,074 |
| <i>R. pyridinivorans</i> SB3094    | no  | GCA_000511305.1 | 5.59  | 67.8 | 3   | 5,165 | 4,893 |
| <i>R. pyridinivorans</i> YF3       | no  | GCA_005944105.1 | 6.09  | -    | 5   | -     | -     |
| <i>R. pyridinivorans</i> ZKA33     | no  | GCA_003633655.1 | 5.71  | 67.7 | 4   | 5,371 | 5,011 |
| <i>R. pyridinivorans</i> ZKA49     | no  | GCA_003610315.1 | 6.42  | 67.6 | 4   | 5,850 | 5,626 |
| <i>R. qingshengii</i> BKS 20-40    | no  | GCA_000341815.1 | 6.60  | 62.4 | 104 | 6,208 | 5,999 |
| <i>R. qingshengii</i> CS98         | no  | GCA_001662505.1 | 6.71  | 62.4 | 25  | 6,278 | 6,096 |
| <i>R. qingshengii</i> CW25         | no  | GCA_001623435.1 | 6.40  | 62.5 | 10  | 6,022 | 5,876 |
| <i>R. qingshengii</i> JCM 15477    | YES | GCA_001646745.1 | 7.26  | 62.4 | 131 | 6,820 | 6,574 |
| <i>R. qingshengii</i> MK1          | no  | GCA_002087025.1 | 6.47  | 62.5 | 40  | 6,039 | 5,871 |
| <i>R. qingshengii</i> TUHH-12      | no  | GCA_000698455.1 | 7.43  | 61.7 | 349 | 7,064 | 5,249 |

|                                    |     |                 |      |      |      |       |       |
|------------------------------------|-----|-----------------|------|------|------|-------|-------|
| <i>R. rhodnii</i> NBRC 100604      | YES | GCA_001894925.1 | 4.46 | 69.7 | 70   | 4,265 | 4,080 |
| <i>R. rhodochrous</i> 11Y          | no  | GCA_002003765.1 | 8.58 | 70.4 | 1809 | 8,676 | 7,062 |
| <i>R. rhodochrous</i> ATCC 17895   | no  | GCA_000469645.1 | 6.87 | 62.3 | 423  | 6396  | 6122  |
| <i>R. rhodochrous</i> ATCC 21198   | no  | GCA_000517665.1 | 6.48 | 70.2 | 161  | 5,957 | 5,692 |
| <i>R. rhodochrous</i> BKS6-46      | no  | GCA_000239135.3 | 6.21 | 67.4 | 609  | 5,664 | 5,348 |
| <i>R. rhodochrous</i> EP4          | no  | GCA_003004765.2 | 5.72 | 67.9 | 1    | 5,198 | 4,942 |
| <i>R. rhodochrous</i> J3           | no  | GCA_900177695.1 | 6.11 | 67.9 | 68   | 5,576 | 5,343 |
| <i>R. rhodochrous</i> KG-21        | no  | GCA_001278665.1 | 6.10 | 69.6 | 232  | 5,633 | 5,215 |
| <i>R. rhodochrous</i> NCTC 10210   | YES | GCA_900187265.1 | 5.27 | 68.2 | 1    | 4,841 | 4,668 |
| <i>R. rhodochrous</i> NCTC 630     | no  | GCA_900455745.1 | 6.51 | 70.6 | 2    | 6,049 | 5,808 |
| <i>R. rhodochrous</i> NRRL B-1306  | no  | GCA_000716895.1 | 6.78 | 61.7 | 85   | 6293  | 6074  |
| <i>R. rhodochrous</i> TRN71        | no  | GCA_001511235.1 | 4.87 | 70.2 | 173  | 4,594 | 3,147 |
| <i>R. ruber</i> BKS 20-38          | no  | GCA_000341965.1 | 6.13 | 69.7 | 108  | 5,642 | 5,342 |
| <i>R. ruber</i> Chol-4             | no  | GCA_000347955.2 | 5.46 | 70.7 | 44   | 5,001 | 4,861 |
| <i>R. ruber</i> IEGM 231           | no  | GCA_000824945.2 | 6.00 | 70.2 | 46   | 5,551 | 5,294 |
| <i>R. ruber</i> NBRC 15591         | YES | GCA_001894945.1 | 5.33 | 70.7 | 56   | 4,879 | 4,740 |
| <i>R. ruber</i> OA1                | no  | GCA_003844175.1 | 5.58 | 70.3 | 323  | 5,266 | 4,878 |
| <i>R. ruber</i> P14                | no  | GCA_002741725.1 | 5.52 | 70.5 | 1    | 5,053 | 4,869 |
| <i>R. ruber</i> P25                | no  | GCA_001051275.1 | 5.73 | 70.5 | 65   | 5,248 | 5,088 |
| <i>R. ruber</i> SD3                | no  | GCA_003086595.1 | 5.37 | 70.6 | 1    | 4,905 | 4,768 |
| <i>R. ruber</i> YC-YT1             | no  | GCA_003586525.1 | 5.91 | 70.2 | 3    | 5,392 | 5,181 |
| <i>R. ruber</i> YYL                | no  | GCA_002863905.1 | 5.92 | 70.3 | 3    | 5,497 | 5,266 |
| <i>Rhodococcus</i> sp. 008         | no  | GCA_001682295.1 | 7.44 | 62.3 | 4    | 6964  | 6767  |
| <i>Rhodococcus</i> sp. 02-925g     | no  | GCA_002259105.1 | 5.75 | 64.7 | 38   | 5394  | 5245  |
| <i>Rhodococcus</i> sp. 05-2221-1B  | no  | GCA_002258635.1 | 6.38 | 64.8 | 60   | 6056  | 5880  |
| <i>Rhodococcus</i> sp. 05-2254-1   | no  | GCA_002258625.1 | 5.93 | 64.5 | 35   | 5620  | 5497  |
| <i>Rhodococcus</i> sp. 05-2254-2   | no  | GCA_002259095.1 | 5.89 | 64.6 | 25   | 5575  | 5431  |
| <i>Rhodococcus</i> sp. 05-2254-3   | no  | GCA_002258555.1 | 5.89 | 64.6 | 33   | 5585  | 5432  |
| <i>Rhodococcus</i> sp. 05-2254-4   | no  | GCA_002259035.1 | 5.92 | 64.6 | 30   | 5615  | 5465  |
| <i>Rhodococcus</i> sp. 05-2254-5   | no  | GCA_002258575.1 | 5.74 | 64.5 | 35   | 5425  | 5303  |
| <i>Rhodococcus</i> sp. 05-2254-6   | no  | GCA_002258565.1 | 5.66 | 64.7 | 195  | 5485  | 5107  |
| <i>Rhodococcus</i> sp. 05-2255-1e  | no  | GCA_002259025.1 | 5.75 | 64.5 | 51   | 5432  | 5277  |
| <i>Rhodococcus</i> sp. 05-2255-2A2 | no  | GCA_002258995.1 | 5.70 | 64.7 | 56   | 5432  | 5264  |
| <i>Rhodococcus</i> sp. 05-2255-3B1 | no  | GCA_002258545.1 | 5.73 | 64.7 | 46   | 5474  | 5314  |
| <i>Rhodococcus</i> sp. 05-2255-3C  | no  | GCA_002258515.1 | 5.73 | 64.7 | 63   | 5469  | 5296  |
| <i>Rhodococcus</i> sp. 05-2256-B1  | no  | GCA_002258465.1 | 5.77 | 64.4 | 42   | 5473  | 5313  |
| <i>Rhodococcus</i> sp. 05-2256-B2  | no  | GCA_002258485.1 | 5.77 | 64.4 | 49   | 5477  | 5311  |
| <i>Rhodococcus</i> sp. 05-2256-B3  | no  | GCA_002259065.1 | 5.77 | 64.4 | 42   | 5466  | 5313  |
| <i>Rhodococcus</i> sp. 05-2256-B4  | no  | GCA_002258975.1 | 5.77 | 64.4 | 62   | 5485  | 5316  |
| <i>Rhodococcus</i> sp. 05-339-2    | no  | GCA_002258965.1 | 5.73 | 64.8 | 22   | 5446  | 5299  |
| <i>Rhodococcus</i> sp. 05-340-1    | no  | GCA_002258925.1 | 5.98 | 64.6 | 44   | 5661  | 5512  |
| <i>Rhodococcus</i> sp. 05-340-2    | no  | GCA_002258915.1 | 5.98 | 64.6 | 43   | 5655  | 5510  |
| <i>Rhodococcus</i> sp. 06-1059B-a  | no  | GCA_002258905.1 | 5.68 | 64.7 | 73   | 5305  | 5121  |
| <i>Rhodococcus</i> sp. 06-1460-1B  | no  | GCA_002258475.1 | 5.78 | 64.6 | 46   | 5496  | 5367  |
| <i>Rhodococcus</i> sp. 06-1474-1B  | no  | GCA_002258885.1 | 5.34 | 64.6 | 37   | 5009  | 4861  |
| <i>Rhodococcus</i> sp. 06-1477-1A  | no  | GCA_002258865.1 | 6.05 | 64.6 | 33   | 5681  | 5520  |
| <i>Rhodococcus</i> sp. 06-1477-1B  | no  | GCA_002258825.1 | 8.84 | 66.7 | 115  | 8296  | 7998  |
| <i>Rhodococcus</i> sp. 06-156-3    | no  | GCA_002258835.1 | 6.30 | 64.4 | 42   | 5857  | 5727  |
| <i>Rhodococcus</i> sp. 06-156-3b   | no  | GCA_002258445.1 | 6.31 | 64.3 | 48   | 5867  | 5737  |
| <i>Rhodococcus</i> sp. 06-156-3C   | no  | GCA_002258795.1 | 6.36 | 64.3 | 46   | 5941  | 5808  |
| <i>Rhodococcus</i> sp. 06-156-4    | no  | GCA_002259345.1 | 6.41 | 64.4 | 39   | 5972  | 5840  |
| <i>Rhodococcus</i> sp. 06-156-4a   | no  | GCA_002258405.1 | 6.30 | 64.4 | 45   | 5856  | 5723  |
| <i>Rhodococcus</i> sp. 06-156-4C   | no  | GCA_002258395.1 | 6.30 | 64.4 | 47   | 5857  | 5723  |
| <i>Rhodococcus</i> sp. 06-221-2    | no  | GCA_002258365.1 | 5.68 | 64.5 | 38   | 5294  | 5181  |
| <i>Rhodococcus</i> sp. 06-235-1A   | no  | GCA_002258785.1 | 6.10 | 64.3 | 37   | 5810  | 5644  |
| <i>Rhodococcus</i> sp. 06-412-2B   | no  | GCA_002258385.1 | 6.36 | 64   | 30   | 6005  | 5859  |
| <i>Rhodococcus</i> sp. 06-412-2C   | no  | GCA_002258295.1 | 6.21 | 64   | 30   | 5860  | 5712  |
| <i>Rhodococcus</i> sp. 06-418-1B   | no  | GCA_002258765.1 | 6.13 | 64.6 | 55   | 5734  | 5577  |
| <i>Rhodococcus</i> sp. 06-418-5    | no  | GCA_002258285.1 | 6.06 | 64.7 | 39   | 5749  | 5597  |
| <i>Rhodococcus</i> sp. 06-462-5    | no  | GCA_002258315.1 | 5.76 | 64.7 | 61   | 5408  | 5241  |
| <i>Rhodococcus</i> sp. 06-469-3-2  | no  | GCA_002258305.1 | 6.03 | 64.6 | 36   | 5664  | 5496  |
| <i>Rhodococcus</i> sp. 06-470-2    | no  | GCA_002258235.1 | 5.90 | 64.8 | 50   | 5605  | 5442  |
| <i>Rhodococcus</i> sp. 06-621-2    | no  | GCA_002258205.1 | 6.23 | 64.5 | 67   | 5881  | 5703  |
| <i>Rhodococcus</i> sp. 1139        | no  | GCA_001757665.1 | 7.04 | 62.3 | 187  | 6700  | 6396  |
| <i>Rhodococcus</i> sp. 114MFTsu3.1 | no  | GCA_000383555.1 | 5.55 | 64.7 | 35   | 5177  | 5052  |
| <i>Rhodococcus</i> sp. 1163        | no  | GCA_002091985.1 | 4.46 | 62.3 | 43   | 4099  | 3953  |
| <i>Rhodococcus</i> sp. 1168        | no  | GCA_002091955.1 | 5.06 | 62.1 | 97   | 4663  | 4421  |
| <i>Rhodococcus</i> sp. 14-1411-2a  | no  | GCA_002259485.1 | 5.61 | 64.7 | 27   | 5288  | 5147  |
| <i>Rhodococcus</i> sp. 14-2470-1a  | no  | GCA_002259425.1 | 6.07 | 64.6 | 67   | 5680  | 5494  |
| <i>Rhodococcus</i> sp. 14-2470-1b  | no  | GCA_002259415.1 | 5.91 | 64.4 | 73   | 5533  | 5341  |

|                                                     |    |                 |       |      |      |        |       |
|-----------------------------------------------------|----|-----------------|-------|------|------|--------|-------|
| <i>Rhodococcus</i> sp. 14-2483-1-1                  | no | GCA_002259335.1 | 5.78  | 64.3 | 36   | 5421   | 5292  |
| <i>Rhodococcus</i> sp. 14-2483-1-2                  | no | GCA_002259405.1 | 5.87  | 64.6 | 27   | 5464   | 5295  |
| <i>Rhodococcus</i> sp. 14-2496-1d                   | no | GCA_002259365.1 | 5.92  | 64.8 | 55   | 5683   | 5510  |
| <i>Rhodococcus</i> sp. 14-2686-1-2                  | no | GCA_002259285.1 | 6.20  | 64.3 | 58   | 5855   | 5646  |
| <i>Rhodococcus</i> sp. 15-1154-1                    | no | GCA_002258715.1 | 5.98  | 64.5 | 47   | 5614   | 5438  |
| <i>Rhodococcus</i> sp. 15-1189-1-1a                 | no | GCA_002259155.1 | 6.24  | 64.3 | 69   | 5894   | 5679  |
| <i>Rhodococcus</i> sp. 15-2388-1-1a                 | no | GCA_002259145.1 | 6.21  | 64.5 | 55   | 5896   | 5732  |
| <i>Rhodococcus</i> sp. 15-649-1-2                   | no | GCA_002258685.1 | 5.78  | 64.6 | 42   | 5393   | 5269  |
| <i>Rhodococcus</i> sp. 15-649-2-2                   | no | GCA_002258645.1 | 6.03  | 64.1 | 52   | 5726   | 5587  |
| <i>Rhodococcus</i> sp. 15-725-2-2b                  | no | GCA_002259075.1 | 6.12  | 64.6 | 33   | 5738   | 5577  |
| <i>Rhodococcus</i> sp. 164Chir2E                    | no | GCA_900101565.1 | 6.26  | 62.5 | 46   | 5884   | 5718  |
| <i>Rhodococcus</i> sp. 1R11                         | no | GCA_004563845.1 | 5.48  | 64.5 | 38   | 5156   | 4989  |
| <i>Rhodococcus</i> sp. 29MFTsu3.1                   | no | GCA_000382105.1 | 5.58  | 64.6 | 57   | 5250   | 5102  |
| <i>Rhodococcus</i> sp. 2G                           | no | GCA_001886355.1 | 5.60  | 67.5 | 2    | 5,256  | 4,930 |
| <i>Rhodococcus</i> sp. 311R                         | no | GCA_001242945.1 | 6.34  | 62.6 | 128  | 5935   | 5735  |
| <i>Rhodococcus</i> sp. 4J2A2                        | no | GCA_001373455.1 | 6.44  | 61.8 | 60   | 5988   | 5762  |
| <i>Rhodococcus</i> sp. 66b                          | no | GCA_002076325.1 | 6.68  | 62.4 | 57   | 6253   | 6069  |
| <i>Rhodococcus</i> sp. 852002-51564<br>SCH6189132-a | no | GCA_001665495.1 | 4.86  | 68.2 | 87   | 4,504  | 4,250 |
| <i>Rhodococcus</i> sp. ABRD24                       | no | GCA_004328705.1 | 5.10  | 66.4 | 1    | 4,572  | 4,381 |
| <i>Rhodococcus</i> sp. ACPA1                        | no | GCA_002300195.1 | 10.06 | 66.9 | 47   | 9,292  | 8,798 |
| <i>Rhodococcus</i> sp. ACPA4                        | no | GCA_002300185.1 | 7.07  | 61.6 | 9    | 6475   | 6269  |
| <i>Rhodococcus</i> sp. ACS1                         | no | GCA_002300155.1 | 10.89 | 67   | 40   | 10,089 | 9,459 |
| <i>Rhodococcus</i> sp. AD45                         | no | GCA_000949305.1 | 6.79  | 61.7 | 9    | 6252   | 6070  |
| <i>Rhodococcus</i> sp. AD45-ID                      | no | GCA_003023755.1 | 6.45  | 61.8 | 8    | 5957   | 5787  |
| <i>Rhodococcus</i> sp. ADH                          | no | GCA_001297885.1 | 7.08  | 62.3 | 129  | 6602   | 6389  |
| <i>Rhodococcus</i> sp. AG1013                       | no | GCA_003350365.1 | 5.86  | 68.2 | 55   | 5,585  | 5,258 |
| <i>Rhodococcus</i> sp. AJR001                       | no | GCA_001652355.1 | 7.26  | 62.4 | 167  | 6833   | 6556  |
| <i>Rhodococcus</i> sp. AQ5-07                       | no | GCA_003313445.1 | 6.75  | 62.4 | 33   | 6352   | 6149  |
| <i>Rhodococcus</i> sp. ARP2                         | no | GCA_001029585.1 | 6.30  | 62.4 | 120  | 5946   | 5730  |
| <i>Rhodococcus</i> sp. AW25M09                      | no | GCA_000333955.1 | 5.64  | 64.1 | 167  | 5384   | 5101  |
| <i>Rhodococcus</i> sp. B7740                        | no | GCA_000954115.1 | 5.34  | 64.9 | 1    | 5018   | 4875  |
| <i>Rhodococcus</i> sp. BH4                          | no | GCA_002079265.1 | 7.02  | 62.3 | 2    | 6533   | 6362  |
| <i>Rhodococcus</i> sp. Br-6                         | no | GCA_001748445.2 | 5.50  | 68.7 | 23   | 5,155  | 5,012 |
| <i>Rhodococcus</i> sp. BS-15                        | no | GCA_000813105.1 | 5.50  | 64.4 | 656  | 5547   | 4101  |
| <i>Rhodococcus</i> sp. BUPNP1                       | no | GCA_002215235.1 | 5.56  | 68.1 | 89   | 5,092  | 4,924 |
| <i>Rhodococcus</i> sp. C9-28                        | no | GCA_005434945.1 | 4.40  | 69.1 | 67   | -      | -     |
| <i>Rhodococcus</i> sp. Chr-9                        | no | GCA_000801125.1 | 5.34  | 67.7 | 142  | 5,047  | 4,651 |
| <i>Rhodococcus</i> sp. CUA-806                      | no | GCA_001942265.1 | 5.80  | 63.9 | 67   | 5645   | 3966  |
| <i>Rhodococcus</i> sp. D-1                          | no | GCA_001976025.1 | 6.93  | 62.3 | 57   | 6535   | 6356  |
| <i>Rhodococcus</i> sp. DK17                         | no | GCA_000263875.1 | 9.11  | 67.1 | 135  | 8,611  | 7,954 |
| <i>Rhodococcus</i> sp. ENV425                       | no | GCA_002887785.1 | 6.21  | 70.3 | 313  | 5,819  | 5,171 |
| <i>Rhodococcus</i> sp. EPR-134                      | no | GCA_001647205.1 | 6.99  | 62.4 | 811  | 6928   | 6120  |
| <i>Rhodococcus</i> sp. EPR-147                      | no | GCA_001647185.1 | 5.35  | 64.8 | 596  | 5363   | 4773  |
| <i>Rhodococcus</i> sp. EPR-157                      | no | GCA_001647195.1 | 5.94  | 63.5 | 695  | 5840   | 5203  |
| <i>Rhodococcus</i> sp. EPR-279                      | no | GCA_001647175.1 | 5.35  | 64.8 | 602  | 5366   | 4750  |
| <i>Rhodococcus</i> sp. EsD8                         | no | GCA_000382865.1 | 6.63  | 70.1 | 287  | 6,081  | 5,747 |
| <i>Rhodococcus</i> sp. Eu-32                        | no | GCA_003336925.1 | 5.61  | 65.1 | 83   | 5236   | 5079  |
| <i>Rhodococcus</i> sp. HA99                         | no | GCA_001312925.1 | 5.89  | 65.4 | 1267 | -      | -     |
| <i>Rhodococcus</i> sp. H-CA8f                       | no | GCA_002501585.1 | 6.50  | 62.5 | 2    | 6122   | 5979  |
| <i>Rhodococcus</i> sp. HS-D2                        | no | GCA_001651055.1 | 5.75  | 67.5 | 202  | 5,432  | 5,103 |
| <i>Rhodococcus</i> sp. IITR03                       | no | GCA_001017865.1 | 6.29  | 67.3 | 657  | 6,123  | 2,676 |
| <i>Rhodococcus</i> sp. JCM 9791                     | no | GCA_001312645.1 | 6.34  | 65.3 | 947  | -      | -     |
| <i>Rhodococcus</i> sp. JCM 9793                     | no | GCA_001312665.1 | 6.28  | 65.3 | 1101 | -      | -     |
| <i>Rhodococcus</i> sp. JG-3                         | no | GCA_000482405.1 | 5.29  | 64.5 | 6    | 4968   | 4848  |
| <i>Rhodococcus</i> sp. JVH1                         | no | GCA_000280725.1 | 9.18  | 67   | 173  | 8,610  | 8,073 |
| <i>Rhodococcus</i> sp. KB6                          | no | GCA_001445685.1 | 7.00  | 62.5 | 165  | 6578   | 6348  |
| <i>Rhodococcus</i> sp. KBS0724                      | no | GCA_005938745.1 | 7.85  | 59.5 | 1556 | 8118   | 7831  |
| <i>Rhodococcus</i> sp. KBW08                        | no | GCA_003852455.1 | 6.95  | 62.4 | 87   | 6405   | 6206  |
| <i>Rhodococcus</i> sp. LB1                          | no | GCA_001583455.1 | 10.75 | 66.6 | 448  | 10,008 | 9,213 |
| <i>Rhodococcus</i> sp. Leaf225                      | no | GCA_001426145.1 | 4.71  | 68.3 | 26   | 4402   | 4274  |
| <i>Rhodococcus</i> sp. Leaf233                      | no | GCA_001426165.1 | 5.53  | 64.5 | 15   | 5209   | 5089  |
| <i>Rhodococcus</i> sp. Leaf247                      | no | GCA_001426185.1 | 4.53  | 67.1 | 5    | 4241   | 4119  |
| <i>Rhodococcus</i> sp. Leaf258                      | no | GCA_001426065.1 | 4.71  | 68.4 | 19   | 4412   | 4293  |
| <i>Rhodococcus</i> sp. Leaf278                      | no | GCA_001426085.1 | 5.72  | 64.1 | 45   | 5386   | 5215  |
| <i>Rhodococcus</i> sp. Leaf7                        | no | GCA_001425985.1 | 4.54  | 67.1 | 7    | 4244   | 4120  |
| <i>Rhodococcus</i> sp. LHW50502                     | no | GCA_004011835.1 | 3.97  | 66.5 | 29   | 3,607  | 3,453 |
| <i>Rhodococcus</i> sp. LHW51113                     | no | GCA_004011825.1 | 3.71  | 66.5 | 22   | 3,373  | 3,243 |
| <i>Rhodococcus</i> sp. LP 11 YM                     | no | GCA_004364595.1 | 7.42  | 62.2 | 63   | 6969   | 6671  |
| <i>Rhodococcus</i> sp. LP 3 YM                      | no | GCA_004363395.1 | 7.42  | 62.2 | 65   | 6967   | 6671  |

|                                       |     |                 |       |      |      |       |       |
|---------------------------------------|-----|-----------------|-------|------|------|-------|-------|
| <i>Rhodococcus</i> sp. M8             | no  | GCA_001890475.2 | 6.32  | 70.3 | 13   | 5,746 | 5,561 |
| <i>Rhodococcus</i> sp. MEB064         | no  | GCA_000834565.1 | 4.66  | 67   | 81   | 4373  | 4239  |
| <i>Rhodococcus</i> sp. MTM3W5.2       | no  | GCA_001984015.1 | 5.67  | 69   | 1    | 5,165 | 4,272 |
| <i>Rhodococcus</i> sp. NCIMB 12038    | no  | GCA_002165735.1 | 9.27  | 67.2 | 109  | 8,498 | 8,035 |
| <i>Rhodococcus</i> sp. NEAU-CX67      | no  | GCA_005049235.1 | 5.37  | -    | 31   | -     | -     |
| <i>Rhodococcus</i> sp. NJ-530         | no  | GCA_003860625.1 | 7.32  | 62.3 | 5    | 6899  | 6491  |
| <i>Rhodococcus</i> sp. OK269          | no  | GCA_003386655.1 | 6.08  | 63.2 | 30   | 5706  | 5522  |
| <i>Rhodococcus</i> sp. OK270          | no  | GCA_900215125.1 | 5.73  | 69   | 42   | 5,356 | 5,143 |
| <i>Rhodococcus</i> sp. OK302          | no  | GCA_002245895.1 | 6.79  | 61.3 | 2    | 6315  | 5976  |
| <i>Rhodococcus</i> sp. OK519          | no  | GCA_003051005.1 | 5.28  | 67.8 | 28   | 4,895 | 4,727 |
| <i>Rhodococcus</i> sp. OK551          | no  | GCA_003387295.1 | 7.02  | 61.7 | 63   | 6570  | 6314  |
| <i>Rhodococcus</i> sp. OK611          | no  | GCA_003050885.1 | 5.73  | 69   | 41   | 5,349 | 5,147 |
| <i>Rhodococcus</i> sp. P1Y            | no  | GCA_003641205.1 | 5.87  | 63.2 | 1    | 5453  | 5253  |
| <i>Rhodococcus</i> sp. P27            | no  | GCA_000454285.1 | 6.26  | 62.4 | 60   | 5956  | 4982  |
| <i>Rhodococcus</i> sp. p52            | no  | GCA_000763325.2 | 5.41  | 67.8 | 4    | 5,076 | 4,753 |
| <i>Rhodococcus</i> sp. PAMC28705      | no  | GCA_004795875.1 | 4.73  | 62.1 | 1    | 4302  | 4117  |
| <i>Rhodococcus</i> sp. PAMC28707      | no  | GCA_004795915.1 | 4.73  | 62.1 | 1    | 4307  | 4122  |
| <i>Rhodococcus</i> sp. PBTS 1         | no  | GCA_001620025.1 | 4.25  | 70   | 1    | 3918  | 3793  |
| <i>Rhodococcus</i> sp. PBTS 2         | no  | GCA_001620005.1 | 5.32  | 64.7 | 2    | 4985  | 4864  |
| <i>Rhodococcus</i> sp. PMG 084        | no  | GCA_004296005.1 | 2.78  | 66.8 | 407  | 2,931 | 2,620 |
| <i>Rhodococcus</i> sp. PMG 254        | no  | GCA_004211705.1 | 6.90  | 61.7 | 63   | 6323  | 6103  |
| <i>Rhodococcus</i> sp. PMG 259        | no  | GCA_004211695.1 | 8.47  | 66.6 | 1043 | 8,392 | 7,409 |
| <i>Rhodococcus</i> sp. PML026         | no  | GCA_000963615.1 | 5.18  | 64.6 | 16   | 4840  | 4694  |
| <i>Rhodococcus</i> sp. Q1             | no  | GCA_004153645.1 | 4.97  | 67.9 | 26   | 4,552 | 4,367 |
| <i>Rhodococcus</i> sp. R04            | no  | GCA_000219395.2 | 8.84  | 69.6 | 2113 | -     | -     |
| <i>Rhodococcus</i> sp. R1101          | no  | GCA_000278445.1 | 4.65  | 68   | 990  | 4,606 | 3,765 |
| <i>Rhodococcus</i> sp. RD6.2          | no  | GCA_001040705.1 | 5.57  | 68.4 | 13   | 5,089 | 4,947 |
| <i>Rhodococcus</i> sp. RS1C4          | no  | GCA_002258225.1 | 5.92  | 64.5 | 79   | 5558  | 5415  |
| <i>Rhodococcus</i> sp. S2-17          | no  | GCA_003130705.1 | 8.01  | 65.6 | 4    | 7,531 | 6,877 |
| <i>Rhodococcus</i> sp. SBT000017      | no  | GCA_003688915.1 | 5.65  | 64.6 | 5    | 5399  | 5169  |
| <i>Rhodococcus</i> sp. SC4            | no  | GCA_001555475.1 | 10.57 | 66.7 | 345  | 9,793 | 9,118 |
| <i>Rhodococcus</i> sp. UNC23MFCrub1.1 | no  | GCA_000686025.1 | 4.70  | 68.5 | 24   | 4394  | 4258  |
| <i>Rhodococcus</i> sp. UNC363MFTsu5.1 | no  | GCA_000686785.1 | 5.67  | 69.3 | 69   | 5,257 | 5,079 |
| <i>Rhodococcus</i> sp. WAY2           | no  | Unpublished     | 8.44  | 65.8 | 5    | 8,236 | 7,631 |
| <i>Rhodococcus</i> sp. WB1            | no  | GCA_001700945.1 | 6.15  | 70.5 | 2    | 5,565 | 5,390 |
| <i>Rhodococcus</i> sp. WMMA185        | no  | GCA_001767395.1 | 4.44  | 64.1 | 1    | 4014  | 3885  |
| <i>Rhodococcus</i> sp. WWJCD1         | no  | GCA_002258735.1 | 5.86  | 64.2 | 41   | 5505  | 5352  |
| <i>Rhodococcus</i> sp. X156           | no  | GCA_004006015.1 | 3.72  | 72.2 | 1    | 3504  | 3389  |
| <i>Rhodococcus</i> sp. YH3-3          | no  | GCA_001653035.1 | 7.32  | 62.1 | 38   | 6967  | 6613  |
| <i>Rhodococcus</i> sp. YL-0           | no  | GCA_002165495.1 | 7.23  | 62.4 | 174  | 6800  | 6548  |
| <i>Rhodococcus</i> sp. YL-1           | no  | GCA_001942025.1 | 7.59  | 62.4 | 6    | 7109  | 6887  |
| <i>R. triatomae</i> BKS 15-14         | no  | GCA_000341795.1 | 5.82  | 69   | 74   | 5,340 | 5,183 |
| <i>R. triatomae</i> DSM 44892         | YES | GCA_900099725.1 | 4.73  | 68.7 | 38   | 4,430 | 4,297 |
| <i>R. tukisamuensis</i> JCM 11308     | YES | GCA_900101735.1 | 5.49  | 69.8 | 40   | 4,976 | 4,759 |
| <i>R. wratislaviensis</i> C31-06      | no  | GCA_003851765.1 | 9.54  | 67.2 | 193  | 8,914 | 8,364 |
| <i>R. wratislaviensis</i> IFP 2016    | no  | GCA_000325625.1 | 9.69  | 67   | 927  | 9,777 | 8,187 |
| <i>R. wratislaviensis</i> NBRC 100605 | YES | GCA_000583735.1 | 10.40 | 66.8 | 151  | 9,514 | 8,883 |
| <i>R. wratislaviensis</i> NCTC 13229  | no  | GCA_900455735.1 | 7.78  | 67.4 | 29   | 7,174 | 6,835 |
| <i>R. wratislaviensis</i> WS3308      | no  | GCA_003385055.1 | 7.84  | 67.4 | 1    | 7,200 | 6,890 |
| <i>R. yunnanensis</i> NBRC 103083     | YES | GCA_001895005.1 | 6.37  | 63.9 | 68   | 5826  | 5650  |
| <i>R. zopfii</i> NBRC 100606          | YES | GCA_001895025.1 | 6.30  | 68.2 | 146  | 5,848 | 5,575 |
